# Supplementary material
Source: Springer Nature journal article supplement (https://www.springermedizin.de/resource/supplementary/13054_2012_999_MOESM6_ESM.pdf/9709812)

**A.**

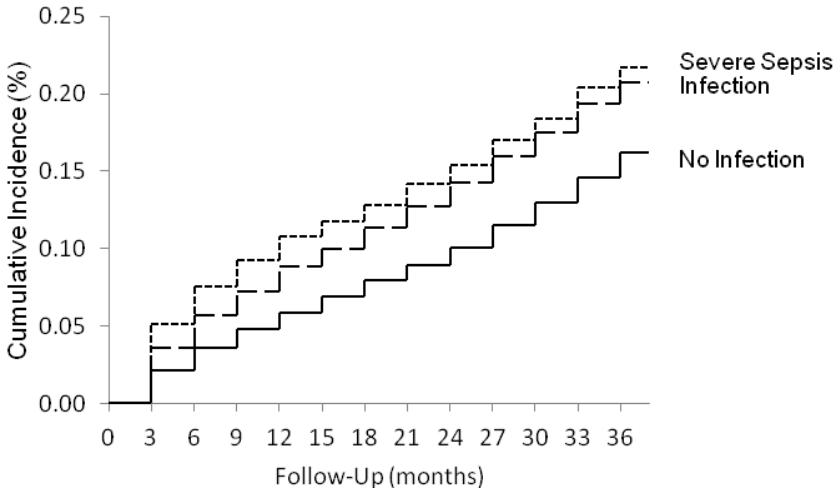

**B.**

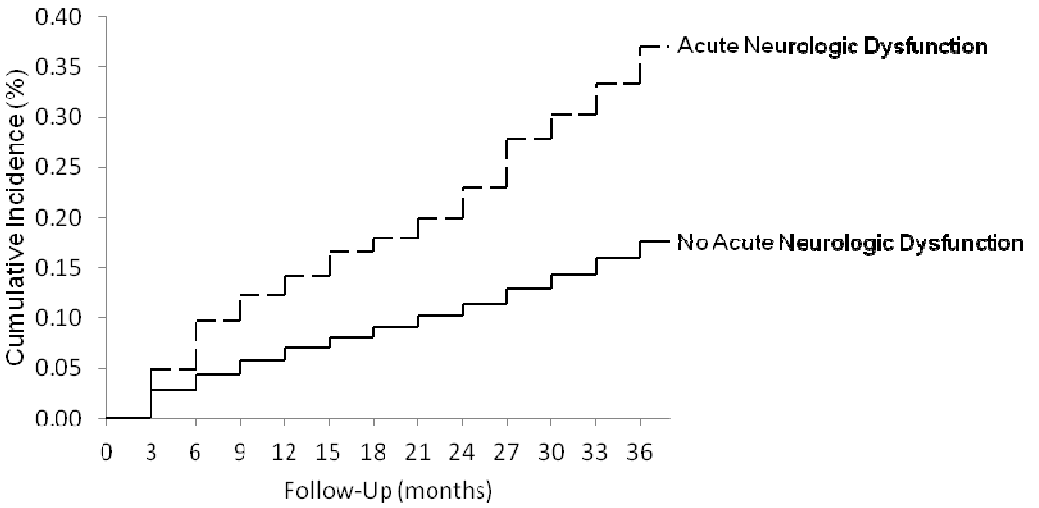

**C.**

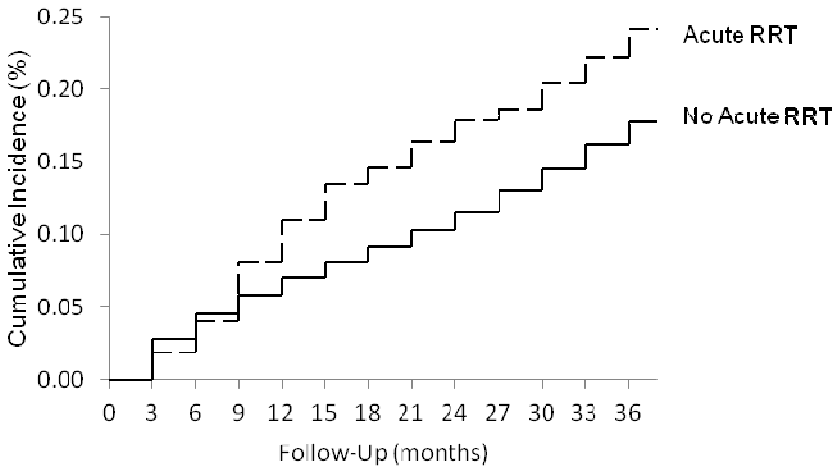

Supplement: MOESM6 [file 9709812]
